# Supplementary material for: Pharmacogenomic analysis indicates potential of 1,5-isoquinolinediol as a universal anti-aging agent for different tissues
Source: PubMed Central journal article supplement (PMC4627305; doi:10.18632/oncotarget.3949), 2015-04-29
Supplement: oncotarget-06-17251-s001.pdf [file oncotarget-06-17251-s001.pdf]

# Pharmacogenomic analysis indicates potential of 1,5-isoquinolinediol as a universal anti-aging agent for different tissues

## Supplementary Material

### Supplementary Table 1

Differentially expressed genes edited from GSE16487 were applied to connectivity map to obtain the candidate agents with potential to reverse aging of artery media. The top 40 ranked chemicals were listed up.

| GSE16487 |                        |                  |
|----------|------------------------|------------------|
| rank     | cmap name              | enrichment score |
| 1        | thapsigargin           | 0.99             |
| 2        | 2-deoxy-D-glucose      | 0.983            |
| 3        | tyrphostin AG-1478     | 0.982            |
| 4        | (-)-catechin           | 0.973            |
| 5        | MG-132                 | 0.966            |
| 6        | oligomycin             | 0.962            |
| 7        | 5149715                | 0.957            |
| 8        | 5140203                | 0.952            |
| 9        | gefitinib              | 0.936            |
| 10       | decitabine             | 0.935            |
| 11       | 5186324                | 0.902            |
| 12       | 5114445                | 0.89             |
| 13       | arachidonyltrifluorome | 0.889            |
| 14       | BW-B70C                | 0.885            |
| 15       | PHA-00665752           | 0.882            |
| 16       | anisomycin             | 0.877            |
| 17       | topiramate             | 0.853            |
| 18       | ambroxol               | 0.846            |
| 19       | 5182598                | 0.844            |
| 20       | 5152487                | 0.837            |
| 21       | semustine              | 0.827            |
| 22       | 1                      | 0.81             |
| 23       | 5666823                | 0.801            |
| 24       | diperodon              | 0.777            |
| 25       | dexverapamil           | 0.774            |
| 26       | cefazolin              | 0.762            |
| 27       | 5162773                | 0.752            |
| 28       | nimodipine             | 0.746            |
| 29       | 1,4-chrysenequinone    | 0.733            |
| 30       | 5109870                | 0.727            |
| 31       | celastrol              | 0.719            |
| 32       | mepacrine              | 0.717            |
| 33       | phenoxybenzamine       | 0.714            |
| 34       | dipivefrine            | 0.713            |
| 35       | menadione              | 0.712            |
| 36       | calmidazolium          | 0.706            |
| 37       | astemizole             | 0.703            |
| 38       | irinotecan             | 0.7              |
| 39       | securinine             | 0.699            |
| 40       | fenbendazole           | 0.699            |

**Supplementary Table 2:** Differentially expressed genes edited from GSE11882 were applied to connectivity map to obtain the candidate agents with potential to reverse aging of biceps brachii. The top 40 ranked chemicals were listed up.

| <b>GSE38718</b> |                       |                  |
|-----------------|-----------------------|------------------|
| rank            | cmap name             | enrichment score |
| 1               | cytochalasin B        | 0.998            |
| 2               | 5149715               | 0.995            |
| 3               | BW-B70C               | 0.992            |
| 4               | 2-deoxy-D-glucose     | 0.956            |
| 5               | tomelukast            | 0.946            |
| 6               | TTNPB                 | 0.937            |
| 7               | 5140203               | 0.934            |
| 8               | 5109870               | 0.931            |
| 9               | W-13                  | 0.924            |
| 10              | decitabine            | 0.904            |
| 11              | 5666823               | 0.884            |
| 12              | dopamine              | 0.87             |
| 13              | DL-PPMP               | 0.855            |
| 14              | clemastine            | 0.832            |
| 15              | penbutolol            | 0.821            |
| 16              | hexetidine            | 0.821            |
| 17              | cefoperazone          | 0.814            |
| 18              | vigabatrin            | 0.813            |
| 19              | lasalocid             | 0.812            |
| 20              | viomycin              | 0.807            |
| 21              | 5186324               | 0.799            |
| 22              | diloxanide            | 0.791            |
| 23              | MS-275                | 0.79             |
| 24              | Prestwick-692         | 0.783            |
| 25              | 5186223               | 0.763            |
| 26              | HC toxin              | 0.762            |
| 27              | naringenin            | 0.759            |
| 28              | atractyloside         | 0.752            |
| 29              | alfadolone            | 0.75             |
| 30              | rifampicin            | 0.749            |
| 31              | adiphenine            | 0.737            |
| 32              | isoflupredone         | 0.733            |
| 33              | atracurium besilate   | 0.73             |
| 34              | podophyllotoxin       | 0.728            |
| 35              | 5151277               | 0.726            |
| 36              | chenodeoxycholic acid | 0.722            |
| 37              | 1,5-isoquinolinediol  | 0.721            |
| 38              | scriptaid             | 0.715            |
| 39              | levomepromazine       | 0.709            |
| 40              | monensin              | 0.706            |

**Supplementary Table 3:** Differentially expressed genes edited from GSE38718 were applied to connectivity map to obtain the candidate agents with potential to reverse aging of superior frontal gyrus. The top 40 ranked chemicals were listed up.

| <b>GSE11882</b> |                      |                  |
|-----------------|----------------------|------------------|
| rank            | cmap name            | enrichment score |
| 1               | (-)-catechin         | 0.951            |
| 2               | 1,5-isoquinolinediol | 0.948            |
| 3               | MG-132               | 0.929            |
| 4               | alcuronium chloride  | 0.909            |
| 5               | sulfadiazine         | 0.905            |
| 6               | STOCK1N-35874        | 0.895            |
| 7               | exisulind            | 0.873            |
| 8               | ketoconazole         | 0.865            |
| 9               | 5666823              | 0.859            |
| 10              | natamycin            | 0.846            |
| 11              | cantharidin          | 0.83             |
| 12              | trazodone            | 0.817            |
| 13              | DL-thiorphan         | 0.811            |
| 14              | piperlongumine       | 0.806            |
| 15              | 8-azaguanine         | 0.801            |
| 16              | verteporfin          | 0.775            |
| 17              | dexverapamil         | 0.767            |
| 18              | harmine              | 0.764            |
| 19              | morantel             | 0.762            |
| 20              | monocrotaline        | 0.76             |
| 21              | scopoletin           | 0.757            |
| 22              | ouabain              | 0.753            |
| 23              | lisinopril           | 0.752            |
| 24              | triflusal            | 0.736            |
| 25              | carbachol            | 0.716            |
| 26              | cefalexin            | 0.713            |
| 27              | picotamide           | 0.708            |
| 28              | noretynodrel         | 0.703            |
| 29              | ursodeoxycholic acid | 0.696            |
| 30              | Prestwick-1084       | 0.693            |
| 31              | etomidate            | 0.691            |
| 32              | lithyronine          | 0.691            |
| 33              | meticrane            | 0.689            |
| 34              | tiabendazole         | 0.681            |
| 35              | 5252917              | 0.681            |
| 36              | benzylamine          | 0.68             |
| 37              | ipratropium bromide  | 0.68             |
| 38              | valdecoxib           | 0.676            |
| 39              | fenoterol            | 0.675            |
| 40              | 5114445              | 0.673            |
